# Supplementary material for: First Approach to the Aroma Characterization of Monovarietal Red Wines Produced from Varieties Better Adapted to Abiotic Stresses
Source: MDPI journal article supplement (doi:10.3390/plants12102063), 2023-05-22
Supplement: s1 [file s1]

**Supplementary table S1. Identification and detection frequency of the pOAC in the monovarietal wine samples analyzed in the GC-O system.**

[illegible]



| Chemical species | Id <sup>a</sup> | KI <sup>b</sup> | Compound / CAS Registry Number | Odour descriptor | Odour series | Monovarietal red wines |          |                   |        |                |       |        |       |                |             |
|------------------|-----------------|-----------------|--------------------------------|------------------|--------------|------------------------|----------|-------------------|--------|----------------|-------|--------|-------|----------------|-------------|
|                  |                 |                 |                                |                  |              | Petit Verdot           | Marselan | Alicante Bouschet | Merlot | Touriga Franca | Syrah | Vinhão | Bobal | Preto Martinho | Trincadeira |
|                  |                 |                 |                                |                  |              |                        |          |                   |        |                |       |        |       |                |             |

<sup>a</sup> Identification letters; <sup>b</sup> Kovats Retention Index in DB-WAX GC Column; <sup>c</sup> compound not confirmed; nd – not detected.
